# Supplementary material for: Protective Response in Experimental Paracoccidioidomycosis Elicited by Extracellular Vesicles Containing Antigens of Paracoccidioides brasiliensis
Source: MDPI journal article supplement (doi:10.3390/cells10071813), 2021-07-17
Supplement: s1 [file s1]

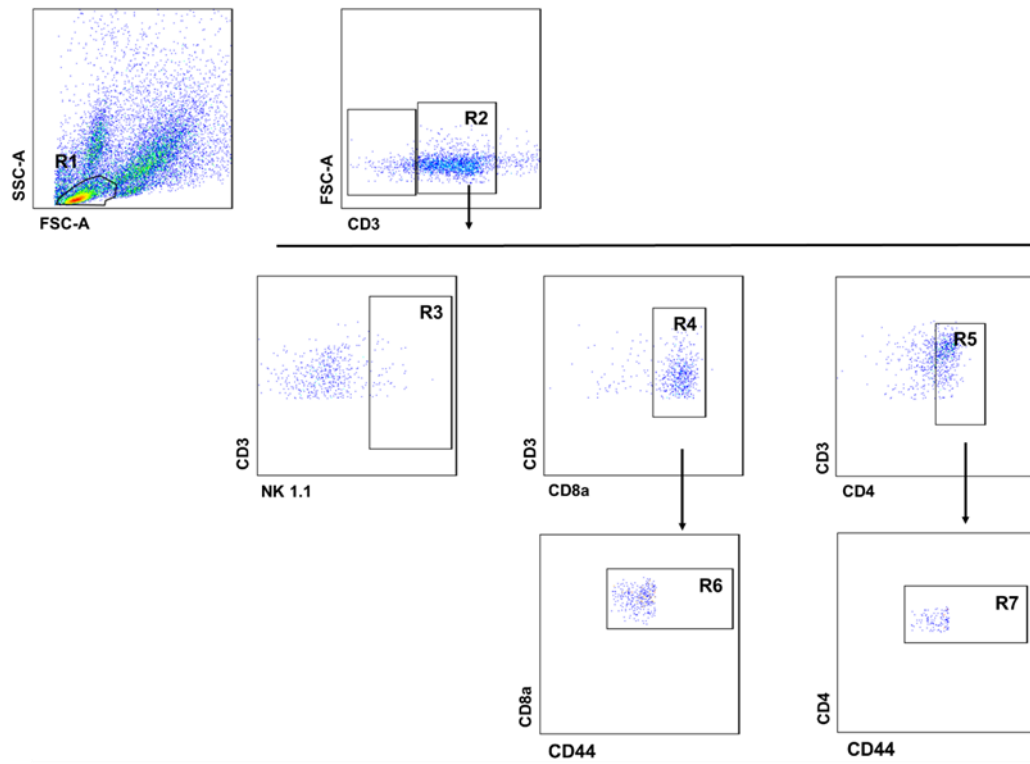

**Figure S1.** Gating strategy for FACS analysis of BALF. Cells (R1) were stratified according to size and granularity (R2) and then according to CD3 expression. CD3<sup>+</sup> NK 1.1<sup>+</sup> cells (R3). CD3<sup>+</sup> CD8<sup>+</sup> T lymphocytes (R4). CD3<sup>+</sup> CD8<sup>+</sup> CD44<sup>+</sup> T lymphocytes (R6). CD3<sup>+</sup> CD4<sup>+</sup> T lymphocytes (R5). CD3<sup>+</sup> CD4<sup>+</sup> CD44<sup>+</sup> T lymphocytes (R7).
